# Supplementary material for: Quantification of Diabetes Comorbidity Risks across Life Using Nation-Wide Big Claims Data
Source: PubMed Central journal article supplement (PMC4391714; doi:10.1371/journal.pcbi.1004125), 2015-04-09
Supplement: pcbi.1004125.s002.pdf [file pcbi.1004125.s002.pdf]

**Table S1: ICD code and disease name for the 123 comorbidities identified in the co-occurrence analysis. For the age groups with the smallest *p*-value the relative risks *RR*, patient ages, and the corresponding *p*-values are shown for DM1 and DM2, respectively. Where the patient sample was too small to apply the statistical tests missing values are shown.**

| ICD | Disease                                                                   | DM1                |               |       | DM2                |               |       |
|-----|---------------------------------------------------------------------------|--------------------|---------------|-------|--------------------|---------------|-------|
|     |                                                                           | <i>p</i>           | <i>RR</i>     | age   | <i>p</i>           | <i>RR</i>     | age   |
| A09 | Diarrhoea and gastroenteritis of presumed infectious origin               | 0.004              | 4.4 (3.0-6.3) | 45-50 | 0.0003             | 1.6 (1.5-1.7) | 80-85 |
| A41 | Other septicaemia                                                         | <10 <sup>-4</sup>  | 12 (8.2-18)   | 45-50 | <10 <sup>-4</sup>  | 2.7 (2.4-2.9) | 65-70 |
| A46 | Erysipelas                                                                | 0.0009             | 3.7 (2.9-4.8) | 65-70 | <10 <sup>-5</sup>  | 2.7 (2.5-3.0) | 65-70 |
| B17 | Other acute viral hepatitis                                               | 0.006              | 7.1 (4.0-13)  | 50-55 | 0.002              | 6.9 (4.5-11)  | 40-45 |
| B18 | Chronic viral hepatitis                                                   | 0.0007             | 6.3 (4.4-9.0) | 50-55 | 0.0006             | 3.2 (2.6-3.8) | 50-55 |
| B35 | Dermatophytosis                                                           | 0.01               | 3.5 (2.4-5.2) | 65-70 | 0.0005             | 2.6 (2.2-3.0) | 65-70 |
| B37 | Candidiasis                                                               | 0.002              | 5.5 (3.7-8.2) | 55-60 | 0.002              | 2.1 (1.8-2.5) | 65-70 |
| B99 | Other and unspecified infectious diseases                                 | 0.003              | 4.7 (3.3-6.9) | 65-70 | 0.004              | 1.7 (1.5-2.0) | 80-85 |
| C25 | Malignant neoplasm of pancreas                                            | 0.0006             | 8.6 (5.6-13)  | 55-60 | 0.0006             | 2.5 (2.1-2.8) | 65-70 |
| D50 | Iron deficiency anaemia                                                   | 0.0003             | 3.7 (3.0-4.6) | 70-75 | <10 <sup>-5</sup>  | 2.7 (2.4-2.8) | 65-70 |
| D63 | Anaemia in chronic disease                                                | <10 <sup>-4</sup>  | 6.3 (4.9-8.2) | 65-70 | <10 <sup>-4</sup>  | 2.8 (2.5-3.2) | 65-70 |
| D64 | Other anaemia                                                             | <10 <sup>-5</sup>  | 4.9 (4.2-5.8) | 65-70 | <10 <sup>-6</sup>  | 2.6 (2.4-2.8) | 65-70 |
| D69 | Purpura and other haemorrhagic conditions                                 | 0.009              | 3.6 (2.4-5.4) | 55-60 | 0.001              | 2.0 (1.7-2.2) | 65-70 |
| E03 | Other hypothyroidism                                                      | 0.0001             | 9.3 (6.4-13)  | 35-40 | 0.0001             | 1.7 (1.6-1.9) | 65-70 |
| E05 | Thyrotoxicosis                                                            | 0.009              | 5.3 (3.1-8.9) | 40-45 | 0.001              | 1.6 (1.5-1.8) | 70-75 |
| E06 | Thyroiditis                                                               | <10 <sup>-6</sup>  | 38 (26-57)    | 10-15 | 0.04               | 1.7 (1.3-2.1) | 55-60 |
| E16 | Other disorders of pancreatic internal secretion                          | <10 <sup>-15</sup> | 170 (130-223) | 20-25 | <10 <sup>-8</sup>  | 5.4 (5.0-5.7) | 80-85 |
| E21 | Hypoparathyroidism                                                        | 0.0006             | 6.1 (4.4-8.6) | 65-70 | 0.0002             | 3.0 (2.6-3.5) | 67-70 |
| E66 | Obesity                                                                   | <10 <sup>-6</sup>  | 3.7 (3.3-4.1) | 65-70 | <10 <sup>-16</sup> | 4.8 (4.6-5.0) | 55-60 |
| E78 | Disorders of lipoprotein metabolism and other lipidaemia                  | <10 <sup>-5</sup>  | 3.4 (3.0-3.7) | 60-65 | <10 <sup>-15</sup> | 3.9 (3.7-4.0) | 55-60 |
| E79 | Disorders or purine and pyrimidine metabolism                             | <10 <sup>-4</sup>  | 3.2 (2.8-3.7) | 65-70 | <10 <sup>-7</sup>  | 2.5 (2.4-2.6) | 65-70 |
| E86 | Volume depletion                                                          | 0.0001             | 9.4 (6.5-14)  | 10-15 | 0.0003             | 1.7 (1.6-1.8) | 75-80 |
| E87 | Other disorders of fluid, electrolyte and acid-base balance.              | <10 <sup>-4</sup>  | 5.9 (4.7-7.3) | 60-65 | <10 <sup>-5</sup>  | 2.5 (2.3-2.6) | 65-70 |
| E88 | Other metabolic disorders                                                 | 0.0001             | 6.4 (4.9-8.4) | 60-65 | <10 <sup>-7</sup>  | 5.1 (4.7-5.6) | 60-65 |
| F01 | Vascular dementia                                                         | 0.0008             | 3.0 (2.4-3.6) | 75-80 | <10 <sup>-4</sup>  | 2.1 (1.9-2.2) | 75-80 |
| F03 | Unspecified dementia                                                      | 0.001              | 2.5 (2.1-2.9) | 75-80 | <10 <sup>-4</sup>  | 1.8 (1.7-1.9) | 75-80 |
| F07 | Personality and behavioral disorders due to known physiological condition | 0.002              | 3.8 (2.9-5.1) | 75-80 | 0.001              | 2.4 (2.0-2.7) | 65-70 |
| F10 | Use of alcohol                                                            | 0.02               | 2.3 (1.7-3.2) | 40-45 | 0.0007             | 2.1 (1.9-2.4) | 45-50 |
| F17 | Use of tobacco                                                            | 0.0004             | 3.3 (2.7-4.1) | 50-55 | <10 <sup>-6</sup>  | 2.8 (2.6-3.0) | 50-55 |
| F20 | Schizophrenia                                                             | 0.09               | 2.1 (1.2-3.7) | 65-70 | 0.001              | 3.4 (2.7-4.2) | 45-50 |
| F25 | Schizoaffective disorders                                                 | -                  | -             | -     | 0.003              | 4.3 (3.0-6.2) | 40-45 |
| F32 | Depressive episode                                                        | 0.001              | 2.3 (1.9-2.6) | 65-70 | <10 <sup>-4</sup>  | 1.7 (1.6-1.8) | 65-70 |
| F33 | Recurrent depressive disorder                                             | 0.05               | 1.9 (1.3-2.6) | 65-70 | 0.003              | 4.8 (3.3-7.0) | 35-40 |
| F79 | Unspecified mental retardation                                            | -                  | -             | -     | 0.009              | 9.3 (6.0-15)  | 40-45 |

|     |                                                           |                    |               |       |                    |               |       |
|-----|-----------------------------------------------------------|--------------------|---------------|-------|--------------------|---------------|-------|
| G20 | Parkinson's disease                                       | 0.002              | 2.3 (1.9-2.7) | 75-80 | 0.001              | 1.5 (1.4-1.6) | 75-80 |
| G30 | Alzheimer's disease                                       | 0.04               | 1.7 (1.3-2.1) | 75-80 | 0.001              | 1.5 (1.4-1.7) | 75-80 |
| G40 | Epilepsy                                                  | 0.004              | 4.6 (3.1-6.9) | 35-40 | 0.003              | 1.6 (1.4-1.7) | 65-70 |
| G45 | Transient cerebral ischaemic attacks                      | 0.006              | 2.8 (2.1-3.7) | 60-65 | 0.0005             | 1.7 (1.6-1.9) | 65-70 |
| G46 | Vascular syndromes of brain in cerebrovascular diseases   | 0.002              | 3.9 (3.0-5.3) | 80-85 | 0.012              | 1.9 (1.6-2.3) | 70-75 |
| G47 | Sleep disorders                                           | 0.02               | 1.9 (1.5-2.4) | 60-65 | 0.0001             | 2.3 (2.1-2.6) | 50-55 |
| G62 | Other polyneuropathies                                    | <10 <sup>-5</sup>  | 8.2 (6.6-10)  | 55-60 | <10 <sup>-5</sup>  | 2.7 (2.5-3.0) | 65-70 |
| G63 | Polyneuropathy in diseases c. e.                          | <10 <sup>-10</sup> | 20 (17-23)    | 65-70 | <10 <sup>-11</sup> | 8.0 (7.6-8.4) | 65-70 |
| G81 | Hemiplegia                                                | 0.008              | 3.9 (2.6-5.3) | 65-70 | 0.001              | 1.9 (1.6-2.3) | 65-70 |
| H21 | Other disorders of iris and ciliary body                  | 0.001              | 10 (6.2-16)   | 75-80 | 0.006              | 6.2 (4.0-9.4) | 55-60 |
| H25 | Senile cataract                                           | <10 <sup>-4</sup>  | 4.7 (3.9-5.7) | 55-60 | 0.0002             | 2.0 (1.8-2.2) | 55-60 |
| H26 | Other cataract                                            | 0.001              | 5.2 (3.7-7.3) | 55-60 | 0.004              | 2.3 (1.9-2.8) | 55-60 |
| H33 | Retinal detachments and breaks                            | 0.0003             | 18 (10-32)    | 30-35 | 0.05               | 2.3 (1.6-3.5) | 45-50 |
| H35 | Other retinal disorders                                   | <10 <sup>-6</sup>  | 10 (8-12)     | 55-60 | <10 <sup>-6</sup>  | 4.3 (3.9-4.7) | 55-60 |
| H36 | Retinal disorders in diseases c. e.                       | <10 <sup>-16</sup> | 200 (160-250) | 30-35 | 0.08               | 230 (180-310) | 30-35 |
| H40 | Glaucoma                                                  | 0.0002             | 14 (8.7-23)   | 40-45 | 0.003              | 1.9 (1.6-2.2) | 60-65 |
| H43 | Disorders of vitreous body                                | <10 <sup>-6</sup>  | 36 (25-53)    | 45-50 | <10 <sup>-4</sup>  | 4.9 (4.1-5.9) | 55-60 |
| H54 | Blindness and low vision                                  | 0.01               | 4.6 (2.7-7.8) | 65-70 | 0.002              | 3.0 (2.4-3.6) | 65-70 |
| I10 | Essential (primary) hypertension                          | <10 <sup>-8</sup>  | 5.3 (4.8-5.9) | 65-70 | <10 <sup>-16</sup> | 9.5 (8.8-10)  | 45-50 |
| I11 | Hypertensive heart disease                                | 0.0005             | 3.6 (2.9-4.5) | 60-65 | <10 <sup>-7</sup>  | 2.9 (2.7-3.1) | 65-70 |
| I12 | Hypertensive chronic kidney disease                       | 0.0002             | 20 (12-35)    | 45-50 | 0.001              | 3.4 (2.8-4.1) | 65-70 |
| I13 | Hypertensive heart disease and hypertensive renal disease | 0.002              | 7.6 (4.7-12)  | 65-70 | 0.001              | 5.1 (3.9-6.6) | 60-65 |
| I15 | Secondary hypertension                                    | 0.01               | 4.8 (2.7-8.3) | 55-60 | 0.0006             | 11 (7.1-18)   | 40-45 |
| I20 | Angina pectoris                                           | 0.0007             | 3.2 (2.6-3.9) | 55-60 | <10 <sup>-7</sup>  | 2.3 (2.2-2.5) | 65-70 |
| I21 | Acute myocardial infarction                               | <10 <sup>-4</sup>  | 3.2 (2.8-3.7) | 75-80 | <10 <sup>-7</sup>  | 2.9 (2.7-3.1) | 65-70 |
| I24 | Other acute ischaemic heart diseases                      | <10 <sup>-4</sup>  | 6.6 (5.2-8.3) | 65-70 | <10 <sup>-4</sup>  | 3.1 (2.8-3.4) | 65-70 |
| I25 | Chronic ischaemic heart disease                           | <10 <sup>-8</sup>  | 5.3 (4.7-5.9) | 60-65 | <10 <sup>-16</sup> | 3.3 (3.2-3.4) | 65-70 |
| I27 | Other pulmonary heart diseases                            | 0.004              | 2.5 (2.0-3.1) | 75-80 | 0.0002             | 2.4 (2.1-2.6) | 65-70 |
| I34 | Nonrheumatic mitral valve disorders                       | 0.001              | 2.4 (2.0-2.8) | 75-80 | <10 <sup>-5</sup>  | 2.3 (2.2-2.5) | 65-70 |
| I35 | Nonrheumatic aortic valve disorders                       | 0.004              | 2.7 (2.1-3.4) | 65-70 | <10 <sup>-4</sup>  | 1.8 (1.7-1.9) | 75-80 |
| I42 | Cardiomyopathy                                            | <10 <sup>-4</sup>  | 4.0 (3.3-4.7) | 65-70 | <10 <sup>-8</sup>  | 3.0 (2.8-3.2) | 65-70 |
| I44 | Atrioventricular and left bundle-branch block             | 0.0004             | 5.1 (3.9-6.8) | 60-65 | <10 <sup>-5</sup>  | 2.5 (2.3-2.7) | 65-70 |
| I45 | Other conduction disorders                                | 0.007              | 3.1 (2.3-4.2) | 70-75 | 0.0007             | 2.1 (1.9-2.4) | 70-75 |
| I47 | Paroxysmal tachycardia                                    | 0.0004             | 3.3 (2.7-4.0) | 75-80 | 0.0003             | 2.0 (1.8-2.2) | 65-70 |
| I48 | Atrial fibrillation and flutter                           | <10 <sup>-4</sup>  | 2.1 (1.9-2.3) | 75-80 | <10 <sup>-9</sup>  | 2.0 (1.9-2.0) | 75-80 |
| I49 | Other cardiac arrhythmias                                 | 0.008              | 2.2 (1.8-2.8) | 70-75 | 0.001              | 1.5 (1.4-1.6) | 75-80 |
| I50 | Heart failure                                             | <10 <sup>-7</sup>  | 5.2 (4.7-5.9) | 65-70 | <10 <sup>-14</sup> | 3.8 (3.6-3.9) | 65-70 |
| I51 | Complications and ill-                                    | 0.0002             | 3.4 (2.8-4.0) | 75-80 | <10 <sup>-6</sup>  | 3.1 (2.8-3.4) | 65-70 |

|     |                                                                |                   |                  |       |                    |                  |       |
|-----|----------------------------------------------------------------|-------------------|------------------|-------|--------------------|------------------|-------|
|     | defined descriptions of heart diseases.                        |                   |                  |       |                    |                  |       |
| I63 | Cerebral Infarction                                            | 0.0002            | 4.4 (3.5-5.6)    | 60-65 | <10 <sup>-6</sup>  | 2.6 (2.4-2.8)    | 65-70 |
| I64 | Stroke, not specified as haemorrhage or infarction.            | <10 <sup>-4</sup> | 4.5 (3.7-5.5)    | 65-70 | <10 <sup>-6</sup>  | 2.8 (2.6-3.1)    | 65-70 |
| I65 | Occlusion and stenosis of precerebral arteries.                | <10 <sup>-4</sup> | 5.3 (4.4-6.4)    | 60-65 | <10 <sup>-8</sup>  | 3.0 (2.8-3.1)    | 65-70 |
| I67 | Other cerebrovascular diseases                                 | 0.0001            | 5.0 (3.9-6.2)    | 60-65 | <10 <sup>-5</sup>  | 2.2 (2.1-2.3)    | 70-75 |
| I69 | Sequelae of cerebrovascular disease                            | 0.005             | 3.5 (2.5-4.9)    | 60-65 | <10 <sup>-6</sup>  | 3.0 (2.8-3.3)    | 65-70 |
| I70 | Atherosclerosis                                                | <10 <sup>-8</sup> | 6.0 (5.4-6.7)    | 70-75 | <10 <sup>-11</sup> | 3.0 (2.5-3.5)    | 65-70 |
| I73 | Other peripheral vascular diseases                             | <10 <sup>-7</sup> | 5.7 (5.1-6.5)    | 65-70 | <10 <sup>-13</sup> | 3.9 (3.7-4.1)    | 65-70 |
| I74 | Arterial embolism and thrombosis                               | 0.002             | 5.4 (3.7-7.7)    | 60-65 | 0.0004             | 3.0 (2.5-3.5)    | 60-65 |
| I77 | Other disorders of arteries and arterioles                     | 0.001             | 10 (6.1-17)      | 50-55 | 0.0006             | 2.5 (2.2-2.9)    | 70-75 |
| I79 | D. of arteries, arterioles and capillaries in diseases c. e.   | <10 <sup>-7</sup> | 23 (18-29)       | 70-75 | <10 <sup>-6</sup>  | 5.7 (5.2-6.1)    | 75-80 |
| I85 | Esophageal varices                                             | 0.005             | 4.3 (2.9-6.4)    | 55-60 | 0.0003             | 3.0 (2.5-3.5)    | 55-60 |
| I87 | Other disorders of veins                                       | 0.009             | 3.7 (2.5-5.5)    | 60-65 | 0.0004             | 2.3 (2.1-2.6)    | 65-70 |
| J15 | Bacterial pneumonia n. e. c.                                   | 0.02              | 2.5 (1.8-3.3)    | 70-75 | 0.0001             | 2.4 (2.2-2.7)    | 65-70 |
| J18 | Pneumonia, organism unspecified                                | <10 <sup>-4</sup> | 2.7 (2.4-3.0)    | 75-80 | <10 <sup>-6</sup>  | 2.3 (2.1-2.4)    | 65-70 |
| J20 | Acute bronchitis                                               | 0.03              | 1.9 (1.5-2.6)    | 80-85 | 0.0007             | 2.2 (2.0-2.5)    | 65-70 |
| J22 | Unspecified acute lower respiratory infection                  | 0.02              | 3.4 (2.1-5.6)    | 75-80 | 0.002              | 3.1 (2.5-3.9)    | 65-70 |
| J44 | Other chronic pulmonary diseases                               | 0.0003            | 2.9 (2.5-3.5)    | 55-60 | <10 <sup>-8</sup>  | 2.2 (2.1-2.3)    | 65-70 |
| J81 | Pulmonary oedema                                               | 0.0003            | 9.9 (6.6-15)     | 60-65 | <10 <sup>-4</sup>  | 3.7 (3.2-4.3)    | 65-70 |
| J90 | Pleural effusion, not elsewhere classified                     | 0.0004            | 3.4 (2.1-5.6)    | 75-80 | 0.0001             | 3.1 (2.5-3.9)    | 65-70 |
| J96 | Respiratory failure, n. e. c.                                  | 0.001             | 9.4 (5.7-16)     | 10-15 | <10 <sup>-4</sup>  | 2.3 (2.1-2.5)    | 65-70 |
| K29 | Gastritis and duodenitis                                       | 0.01              | 1.8 (1.5-2.1)    | 60-65 | 0.0002             | 1.5 (1.4-1.5)    | 70-75 |
| K40 | Inguinal hernia                                                | 0.04              | 0.37 (0.23-0.60) | 75-80 | 0.001              | 0.48 (0.41-0.56) | 65-70 |
| K52 | Other and unspecified noninfective gastroenteritis and colitis | 0.006             | 2.1 (1.7-2.6)    | 75-80 | 0.0008             | 1.5 (1.4-1.6)    | 80-85 |
| K70 | Alcoholic liver disease                                        | 0.005             | 4.0 (2.7-5.7)    | 45-50 | 0.0001             | 2.6 (2.3-2.9)    | 55-60 |
| K71 | Toxic liver disease                                            | 0.05              | 2.8 (1.6-4.9)    | 55-60 | 0.0003             | 14 (8.5-23)      | 35-40 |
| K74 | Fibrosis and cirrhosis of liver                                | 0.0004            | 5.0 (3.7-6.6)    | 55-60 | <10 <sup>-4</sup>  | 2.4 (2.2-2.7)    | 65-70 |
| K76 | Other diseases of liver                                        | 0.0005            | 2.7 (2.2-3.1)    | 60-65 | <10 <sup>-8</sup>  | 3.0 (2.8-3.2)    | 55-60 |
| K80 | Cholelithiasis                                                 | 0.008             | 1,7 (1.5-2.0)    | 75-80 | <10 <sup>-4</sup>  | 1.5 (1.4-1.6)    | 80-85 |
| K83 | Other diseases of biliary tract                                | 0.003             | 7.5 (4.6-12)     | 50-55 | 0.03               | 1.4 (1.2-1.6)    | 80-85 |
| K85 | Acute pancreatitis                                             | 0.006             | 4.5 (3.0-6.9)    | 50-55 | <10 <sup>-4</sup>  | 4.7 (3.9-5.8)    | 45-50 |
| K86 | Other diseases of pancreas                                     | <10 <sup>-5</sup> | 13 (9.3-17)      | 50-55 | <10 <sup>-5</sup>  | 11 (8.4-14)      | 40-45 |
| K90 | Intestinal malabsorption                                       | 0.001             | 10 (6.3-17)      | 10-15 | 0.4                | 1.2 (0.7-2.2)    | 60-65 |
| L03 | Cellulitis and acute lymphangitis                              | 0.0005            | 5.5 (4.0-7.4)    | 65-70 | 0.0006             | 2.5 (2.1-2.9)    | 65-70 |
| L30 | Other and unspecified dermatitis                               | 0.01              | 5.1 (3.0-8.7)    | 45-50 | 0.001              | 1.9 (1.7-2.1)    | 80-85 |
| L89 | Decubitus ulcer                                                | 0.0002            | 7.2 (5.2-9.9)    | 65-70 | <10 <sup>-4</sup>  | 2.2 (2.0-2.4)    | 80-85 |

|     |                                                          |                    |                  |       |                    |                  |       |
|-----|----------------------------------------------------------|--------------------|------------------|-------|--------------------|------------------|-------|
| L97 | Ulcer of lower limb n. e. c.                             | <10 <sup>-4</sup>  | 7.4 (5.8-9.4)    | 65-70 | <10 <sup>-6</sup>  | 4.2 (3.9-4.6)    | 65-70 |
| L98 | Other disorders of skin and subcutaneous tissue          | <10 <sup>-5</sup>  | 9.0 (7.2-11)     | 70-75 | <10 <sup>-4</sup>  | 3.4 (3.1-3.9)    | 65-70 |
| M20 | Acquired deformities of fingers and toes                 | 0.09               | 0.44 (0.25-0.88) | 60-65 | 0.002              | 0.41 (0.34-0.49) | 65-70 |
| M23 | Internal derangement of knee                             | 0.03               | 0.31 (0.19-0.52) | 60-65 | 0.0006             | 0.45 (0.40-0.52) | 65-70 |
| M47 | Spondylosis                                              | 0.04               | 1.7 (1.3-2.1)    | 85-90 | 0.0003             | 1.6 (1.5-1.7)    | 70-75 |
| M54 | Dorsalgia                                                | 0.06               | 1.3 (1.1-1.6)    | 65-70 | 0.002              | 1.4 (1.3-1.5)    | 60-65 |
| M86 | Osteomyelitis                                            | <10 <sup>-6</sup>  | 13 (10-16)       | 65-70 | <10 <sup>-5</sup>  | 4.4 (3.9-5.0)    | 65-70 |
| N04 | Nephrotic syndrome                                       | <10 <sup>-4</sup>  | 33 (19-56)       | 45-50 | 0.001              | 4.9 (3.8-6.4)    | 60-65 |
| N08 | Glomerular d. in diseases c. e.                          | <10 <sup>-12</sup> | 128 (98-166)     | 40-45 | <10 <sup>-9</sup>  | 8.6 (8.2-9.1)    | 65-70 |
| N17 | Acute renal failure                                      | <10 <sup>-4</sup>  | 13 (8.9-20)      | 45-50 | <10 <sup>-6</sup>  | 3.4 (3.1-3.7)    | 65-70 |
| N18 | Chronic renal failure                                    | <10 <sup>-10</sup> | 8.0 (7.2-8.9)    | 65-70 | <10 <sup>-14</sup> | 4.2 (4.0-4.4)    | 65-70 |
| N19 | Unspecified renal failure                                | <10 <sup>-7</sup>  | 9.4 (8.1-11)     | 65-70 | <10 <sup>-6</sup>  | 3.2 (2.9-3.5)    | 65-70 |
| N25 | Disorders resulting from impaired renal tubular function | 0.002              | 9.0 (5.5-15)     | 70-75 | 0.001              | 3.9 (3.1-4.9)    | 65-70 |
| N28 | O. d. of kidney and ureter, n. e. c.                     | 0.004              | 5.8 (3.7-9.1)    | 50-55 | 0.0008             | 2.7 (2.3-3.2)    | 55-60 |
| N39 | Other disorders of urinary system                        | <10 <sup>-4</sup>  | 2.5 (2.2-2.8)    | 80-85 | <10 <sup>-7</sup>  | 1.8 (1.7-1.9)    | 80-85 |
| N47 | Disorders of prepuce                                     | 0.007              | 6.0 (3.5-10)     | 45-50 | 0.001              | 3.1 (2.5-3.8)    | 55-60 |
